# Supplementary material
Source: PubMed Central journal article supplement (PMC5384098)
Supplement: mmc1.pdf [file mmc1.pdf]

**The American Journal of Human Genetics, Volume 100**

**Supplemental Data**

**Modeling the Mutational and Phenotypic**

**Landscapes of Pelizaeus-Merzbacher Disease**

**with Human iPSC-Derived Oligodendrocytes**

**Zachary S. Nevin, Daniel C. Factor, Robert T. Karl, Panagiotis Douvaras, Jeremy Laukka, Martha S. Windrem, Steven A. Goldman, Valentina Fossati, Grace M. Hobson, and Paul J. Tesar**

Figure S1.

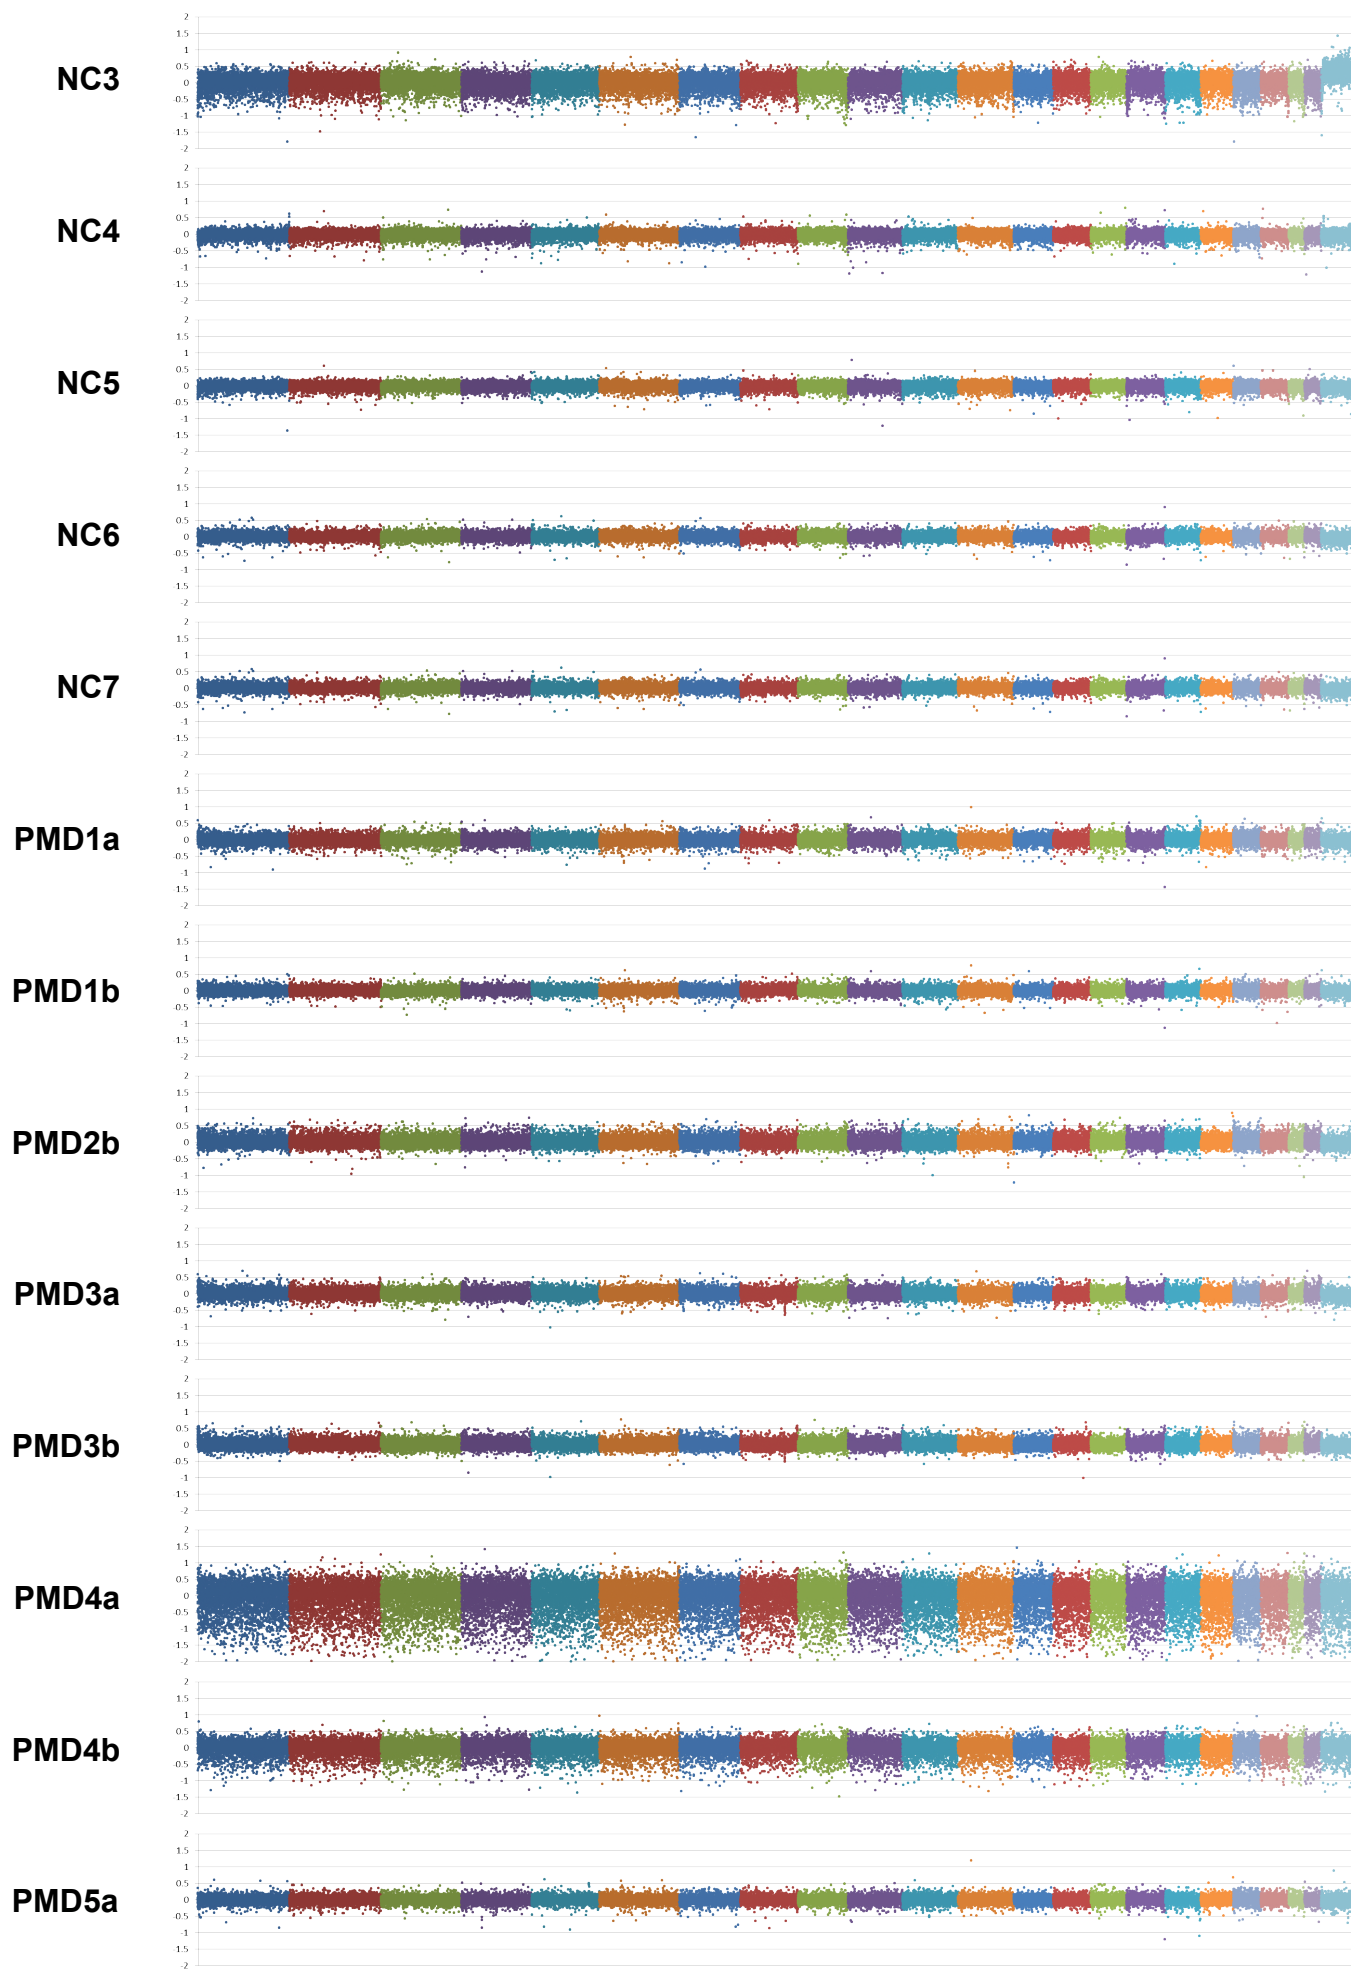

Figure S1 (continued).

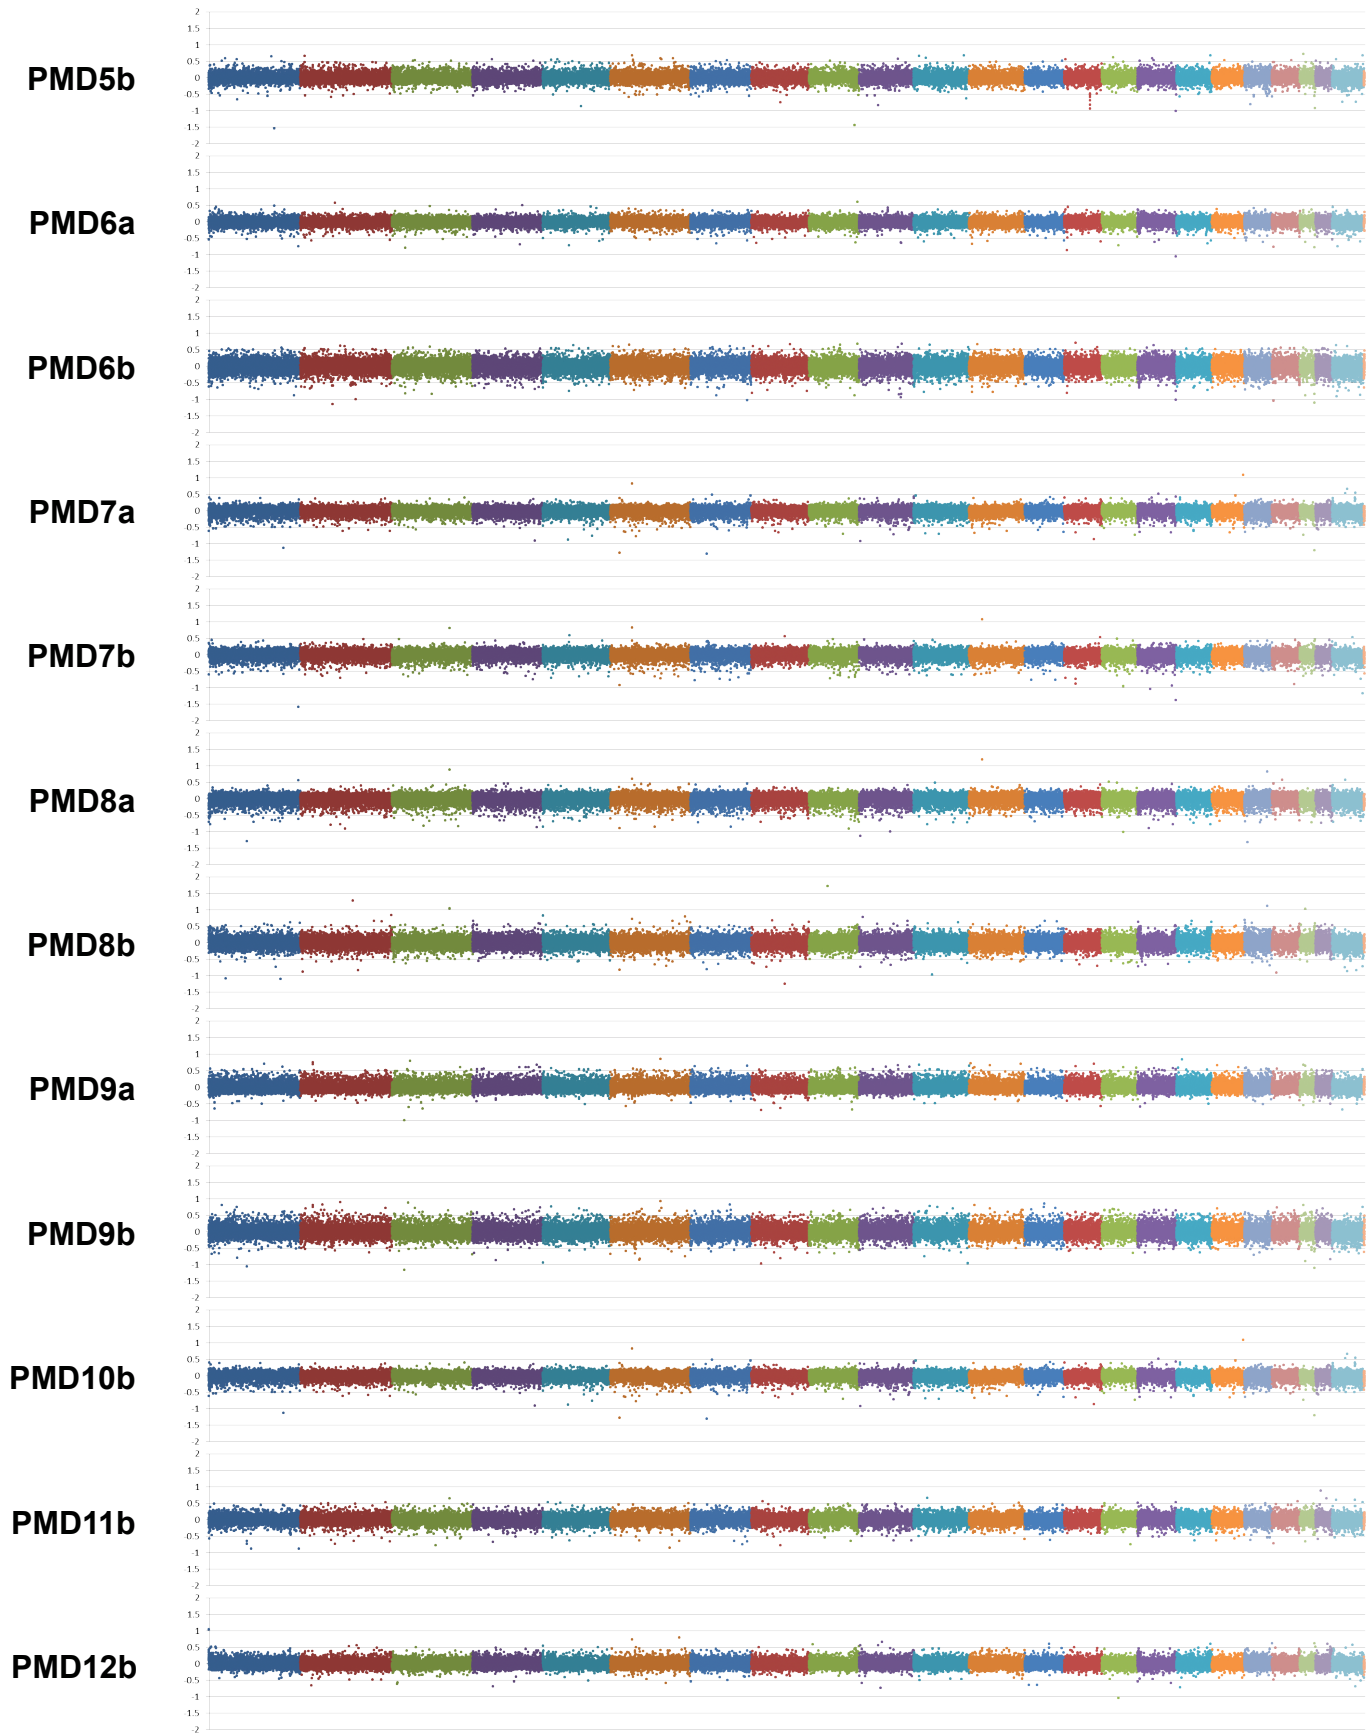

**Figure S1. High Density SNP Microarray Analysis**

The remainder of the lines not included in Main Figure 1E. Plots demonstrating the gross genomic integrity of derived pluripotent lines. Relative copy number was calculated for each SNP in a high density SNP microarray. Every 100th SNP, arranged by ranked genomic coordinate, was plotted as a Log R Ratio. SNPs are colored by chromosome.

Figure S2.

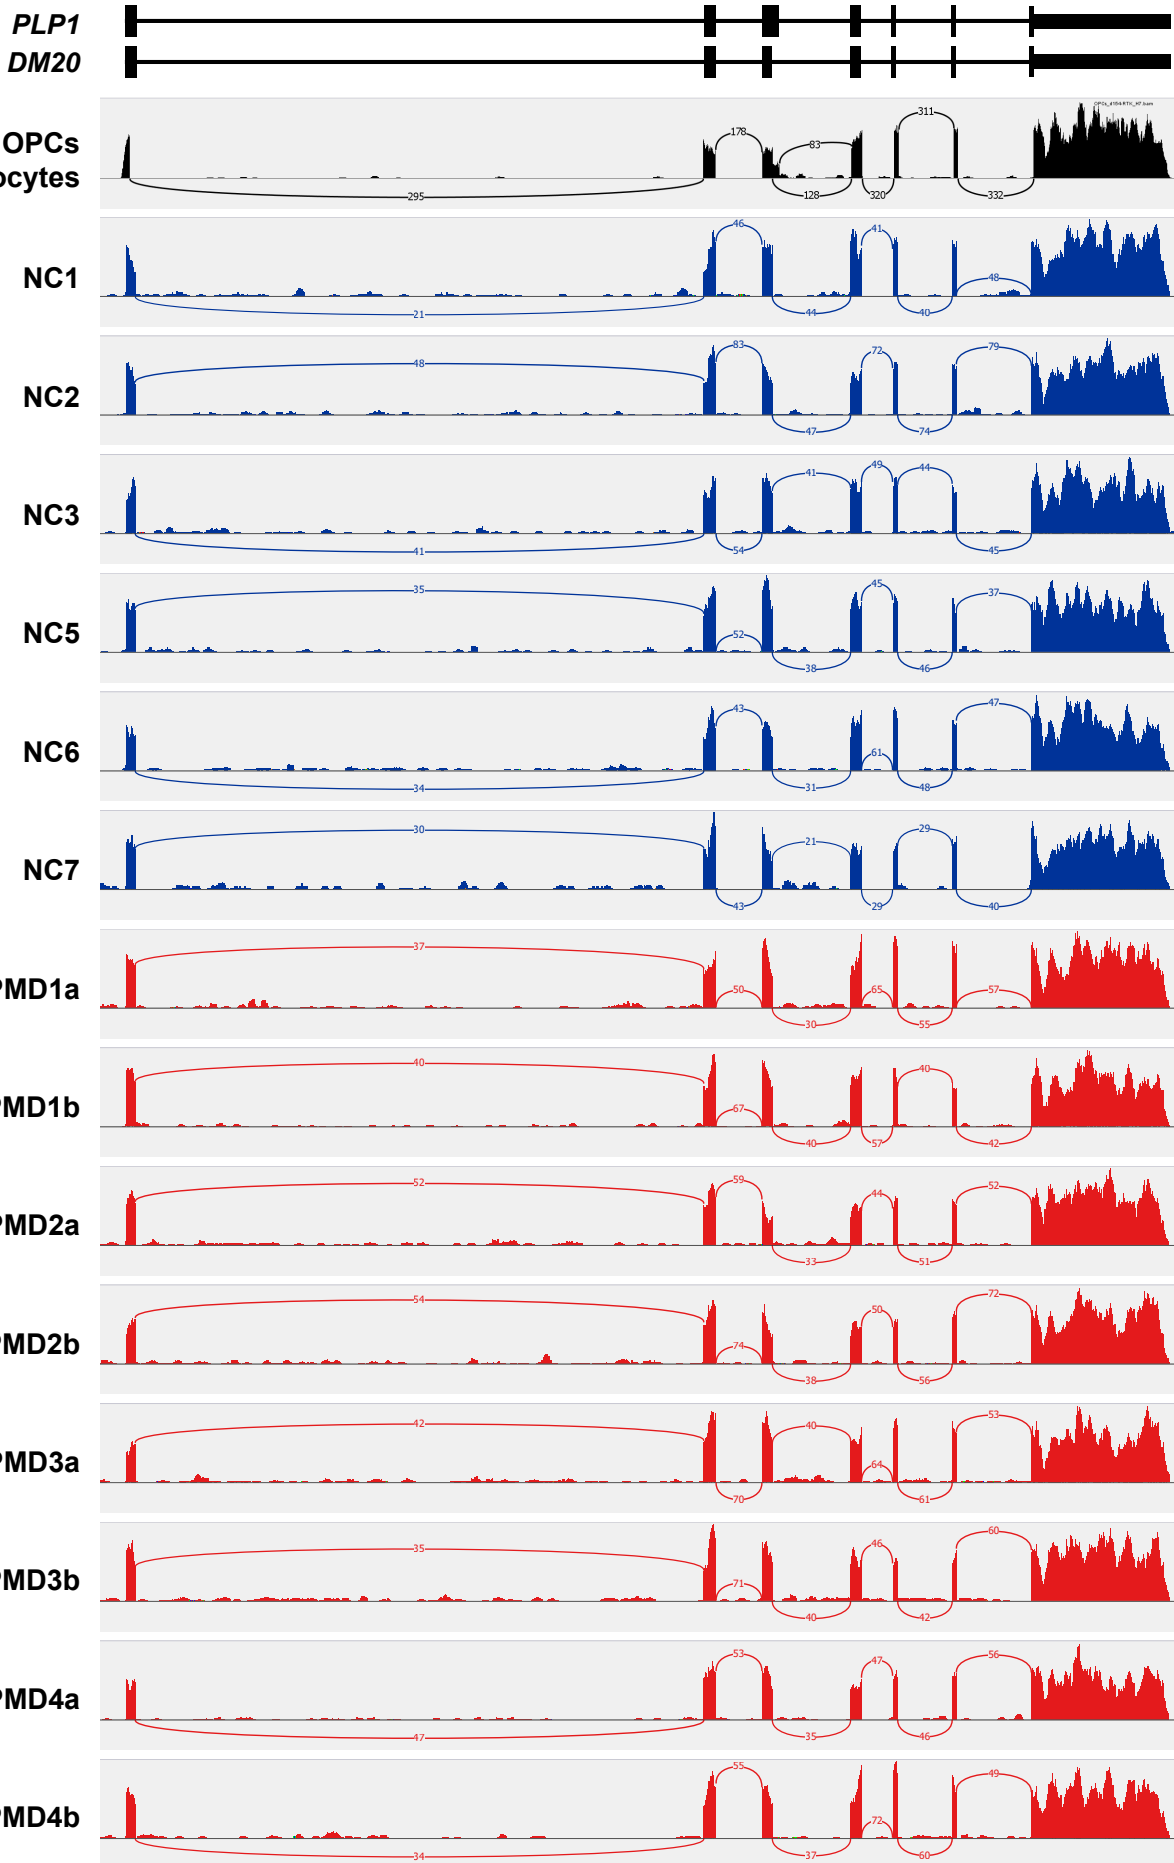

Figure S2 (continued).

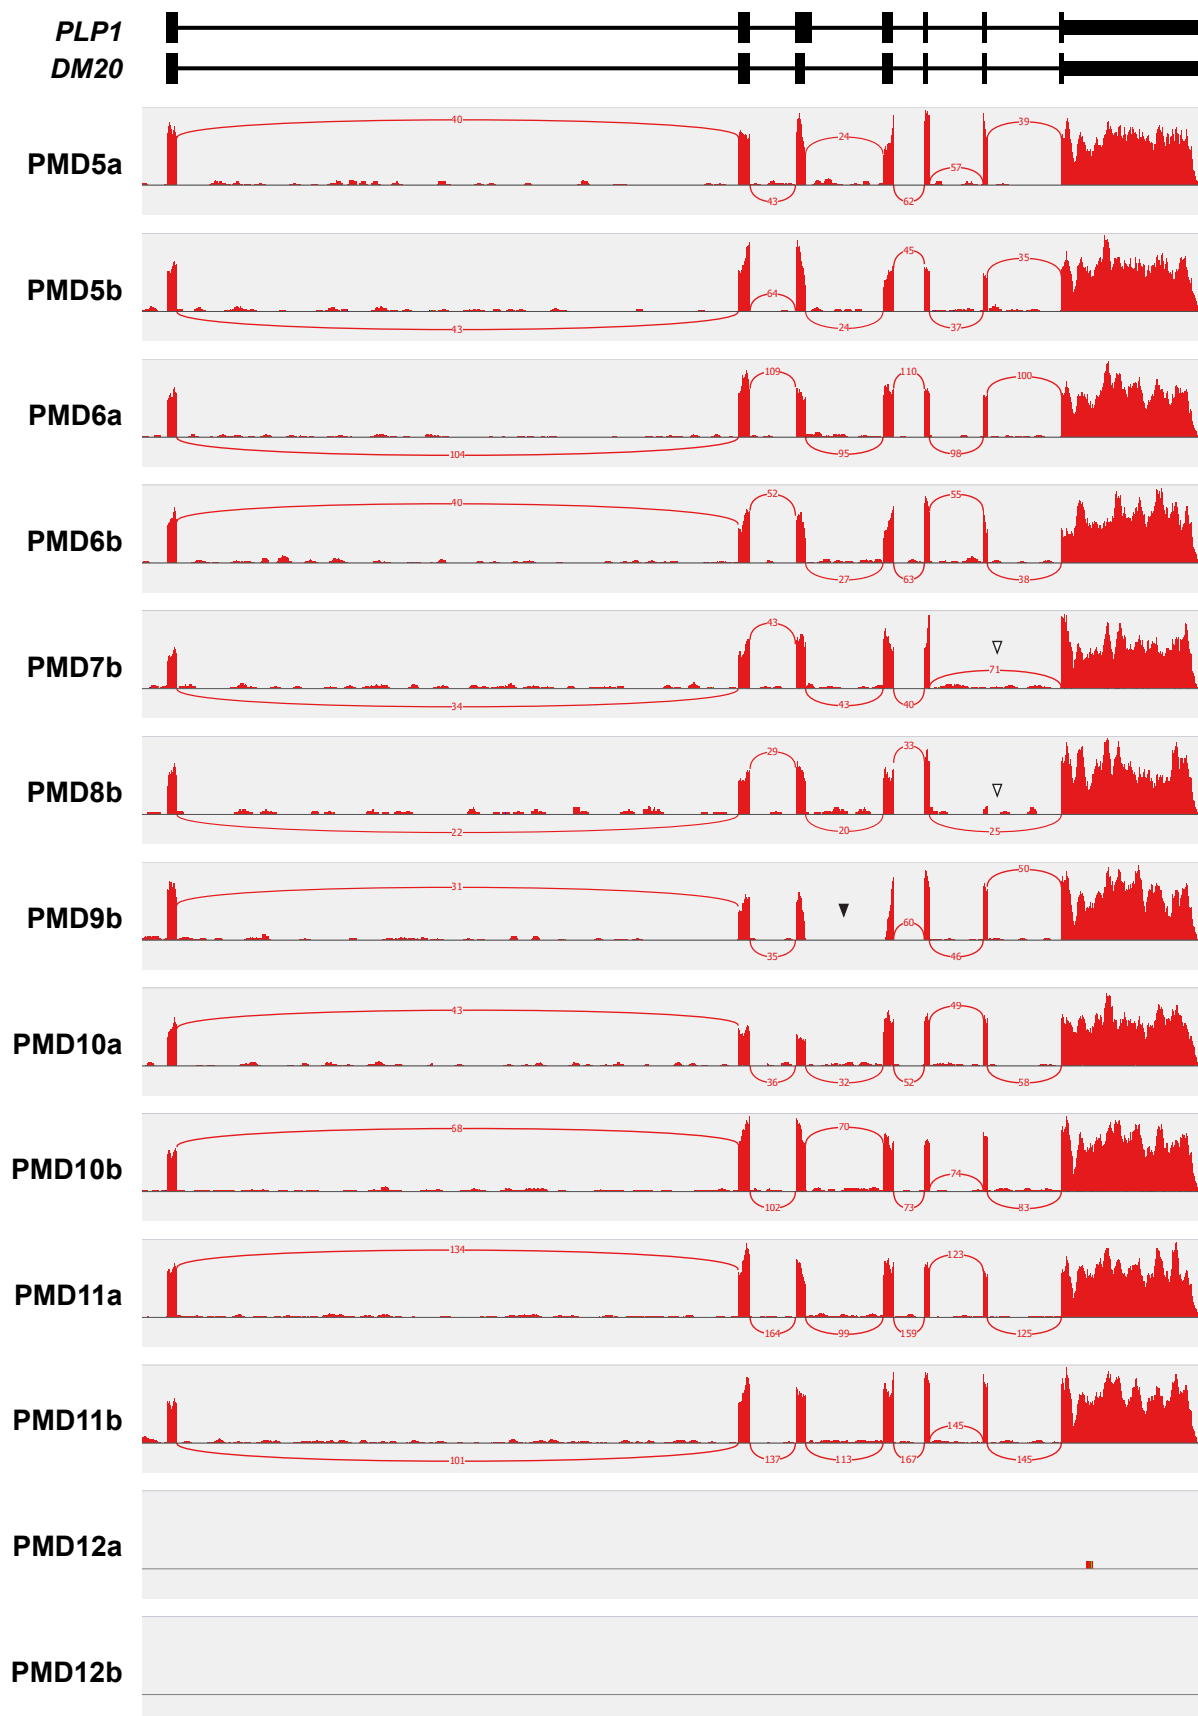

**Figure S2. mRNA Splicing Analysis**

The remainder of the lines not included in Main Figure 2E. PLP1 mRNA splicing was quantified in PMD hiPSCs and controls using Integrated Genome Viewer's Sashimi plot function. PMD7 and 8 demonstrate skipping of exon 6 (white arrowheads). The exon 3-4 junction cannot be annotated in PMD9 (black arrowhead) due to its partial deletion. For comparison, splicing analysis of day 154 differentiated NC2 mixed OPCs and oligodendrocytes is also provided, demonstrating the presence of both DM20 and PLP1 transcripts.

**Table S1. Primers for *PLP1* Exon Sequencing.**

| <i>PLP1</i> Exon      | Forward Primer          | Reverse Primer         |
|-----------------------|-------------------------|------------------------|
| 1                     | AAAGCGAAATTCCAGGCAAGC   | GATAGAGGGAAGTGAGGGGGT  |
| 2                     | AAGGATTCTGGGTCAATCTCACA | CACAGAGGGAAGACTCGGGA   |
| 3                     | TGGCGGGAGGGGCATATGTTTC  | AGACTCGCGCCCAATTTTCCCC |
| 4                     | GGCTTTGTTCAATGGCTAGGG   | GTGGGTAGGAGAGCCAAAGC   |
| 5                     | GGCCATTACATTGGCCTAC     | TCTATGCTCATTGGCTCAGGC  |
| 6                     | CTGGGCACAACGTAGGGAAC    | GCCAATGCAAGTAGAAGTACGG |
| 7                     | TCCCTGAGGAAAACCTCAGTGC  | GCAGGAACCAGCTATGAAGCA  |
| 3-4 Fusion<br>in PMD9 | TTCTCCAGGTCCCAGGGTAAG   | AGTGCTTCCATAGTGGGTAGGA |

**Table S2. Prior Publications Involving PMD Samples in this Study.**

| Sample            | Citation(s) |
|-------------------|-------------|
| PMD1              | 1           |
| PMD2              | 1           |
| PMD3              |             |
| PMD4              | 2           |
| PMD5              | 3           |
| PMD6              | 4; 5        |
| PMD7/8 (siblings) | 1; 6-8      |
| PMD9              | 9           |
| PMD10             | 1           |
| PMD11             |             |
| PMD12             | 1; 10       |

**Table S3. Details on Control Pluripotent Cell Lines.**

| Panel ID | Cell Type | NIH Registry ID | Reprogramming Method | Gender |
|----------|-----------|-----------------|----------------------|--------|
| NC1      | hESC      | H1              | --                   | Male   |
| NC2      | hESC      | H7              | --                   | Female |
| NC3      | hESC      | H9              | --                   | Female |
| NC4      | hiPSC     | --              | Episomal             | Male   |
| NC5      | hiPSC     | --              | Lentiviral           | Male   |
| NC6      | hiPSC     | --              | Lentiviral           | Female |
| NC7      | hiPSC     | --              | Lentiviral           | Male   |



## Supplemental References

1. Laukka, J.J., Stanley, J.A., Garbern, J.Y., Trepanier, A., Hobson, G., Lafleur, T., Gow, A., and Kamholz, J. (2013). Neuroradiologic correlates of clinical disability and progression in the X-linked leukodystrophy Pelizaeus-Merzbacher disease. *J Neurol Sci* 335, 75-81.
2. Hobson, G.M., Huang, Z., Sperle, K., Sistermans, E., Rogan, P.K., Garbern, J.Y., Kolodny, E., Naidu, S., and Cambi, F. (2006). Splice-site contribution in alternative splicing of PLP1 and DM20: molecular studies in oligodendrocytes. *Hum Mutat* 27, 69-77.
3. Taube, J.R., Sperle, K., Banser, L., Seeman, P., Cavan, B.C., Garbern, J.Y., and Hobson, G.M. (2014). PMD patient mutations reveal a long-distance intronic interaction that regulates PLP1/DM20 alternative splicing. *Hum Mol Genet* 23, 5464-5478.
4. Gencic, S., Abuelo, D., Ambler, M., and Hudson, L.D. (1989). Pelizaeus-Merzbacher disease: an X-linked neurologic disorder of myelin metabolism with a novel mutation in the gene encoding proteolipid protein. *Am J Hum Genet* 45, 435-442.
5. Wood, P.L., Smith, T., Pelzer, L., and Goodenowe, D.B. (2011). Targeted metabolomic analyses of cellular models of pelizaeus-merzbacher disease reveal plasmalogen and myo-inositol solute carrier dysfunction. *Lipids Health Dis* 10, 102.
6. Carango, P., Funanage, V.L., Quiros, R.E., Debruyne, C.S., and Marks, H.G. (1995). Overexpression of DM20 messenger RNA in two brothers with Pelizaeus-Merzbacher disease. *Ann Neurol* 38, 610-617.
7. Hobson, G.M., Davis, A.P., Stowell, N.C., Kolodny, E.H., Sistermans, E.A., de Coo, I.F., Funanage, V.L., and Marks, H.G. (2000). Mutations in noncoding regions of the proteolipid protein gene in Pelizaeus-Merzbacher disease. *Neurology* 55, 1089-1096.
8. Southwood, C.M., Garbern, J., Jiang, W., and Gow, A. (2002). The unfolded protein response modulates disease severity in Pelizaeus-Merzbacher disease. *Neuron* 36, 585-596.
9. Kleindorfer, D.O., Dlouhy, S.R., Pratt, V.M., Jones, M.C., Trofatter, J.A., and Hodes, M.E. (1995). In-frame deletion in the proteolipid protein gene of a family with Pelizaeus-Merzbacher disease. *Am J Med Genet* 55, 405-407.
10. Inoue, K., Osaka, H., Thurston, V.C., Clarke, J.T., Yoneyama, A., Rosenbarker, L., Bird, T.D., Hodes, M.E., Shaffer, L.G., and Lupski, J.R. (2002). Genomic rearrangements resulting in PLP1 deletion occur by nonhomologous end joining and cause different dysmyelinating phenotypes in males and females. *Am J Hum Genet* 71, 838-853.
